# Supplementary material for: Pomegranate Extract Affects Fungal Biofilm Production: Consumption of Phenolic Compounds and Alteration of Fungal Autoinducers Release
Source: MDPI journal article supplement (doi:10.3390/ijerph192114146), 2022-10-29
Supplement: s1 [file s1]

**Table S1.** Composition of Pomegranate peel extract.

| INCI name                                | % w/w              | CAS                   | EINECS    |
|------------------------------------------|--------------------|-----------------------|-----------|
| AQUA                                     | Q.S. to/Q.B. a 100 | 7732-18-5             | 231-791-2 |
| PUNICA GRANATUM PEEL<br>EXTRACT          | 22.5               | 84961-57-9            | 284-646-0 |
| SACCHAROMYCES FERMENT<br>LYSATE FILTRATE | 1-4                | -----                 | -----     |
| CITRIC ACID                              | 1.5                | 77-92-9 / 5949-29-1   | 201-069-1 |
| SODIUM BENZOATE                          | 0.2                | 532-32-1              | 208-534-8 |
| POTASSIUM SORBATE                        | 0.1                | 24634-61-5 / 590-00-1 | 246-376-1 |

The ingredients and their quantities are shown, as indicated by the producer.

**Table S2.** Mass spectral data of the identified compounds.

| Compound                                 | Formula                                         | z  | RT    | [M-H]-<br>exp (m/z) | MS2 ions (m/z)                            |
|------------------------------------------|-------------------------------------------------|----|-------|---------------------|-------------------------------------------|
| Citric acid                              | C <sub>6</sub> H <sub>8</sub> O <sub>7</sub>    | -1 | 1.15  | 191.0186            | 111,0074; 87,0073                         |
| Punicalagin isomer                       | C <sub>48</sub> H <sub>28</sub> O <sub>30</sub> | -2 | 8.32  | 541.0259            | 300,9987; 275,0197; 600,9899; 781,0546;   |
| Punicalagin isomer                       | C <sub>48</sub> H <sub>28</sub> O <sub>31</sub> | -2 | 6.06  | 541.0259            | 300,9987; 275,0197; 600,9899; 781,0546;   |
| Brevifolin carboxylic acid               | C <sub>13</sub> H <sub>8</sub> O <sub>8</sub>   | -1 | 8.35  | 291.0143            | 247,0296; 191,0347                        |
| Punicalagin isomer                       | C <sub>48</sub> H <sub>28</sub> O <sub>31</sub> | -2 | 2.94  | 541.0259            | 300,9987; 275,0197; 600,9899; 781,0546;   |
| Ellagic acid                             | C <sub>14</sub> H <sub>6</sub> O <sub>8</sub>   | -1 | 15.13 | 300.9986            | 257.01                                    |
| Galloyl-HHDP-hexoside                    | C <sub>27</sub> H <sub>22</sub> O <sub>18</sub> | -1 | 10.39 | 633.0733            | 300,9990; 275,0197; 463,0509              |
| Gallic acid                              | C <sub>7</sub> H <sub>7</sub> O <sub>5</sub>    | -1 | 1.76  | 169.0131            | 125.02                                    |
| Punicalin                                | C <sub>34</sub> H <sub>22</sub> O <sub>22</sub> | -1 | 2.03  | 781.0530            | 600,9896; 721,0267                        |
| HHDP-hexoside isomer                     | C <sub>20</sub> H <sub>18</sub> O <sub>14</sub> | -1 | 1.10  | 481.0623            | 300,9989; 275,0199                        |
| HHDP-hexoside isomer                     | C <sub>20</sub> H <sub>18</sub> O <sub>14</sub> | -1 | 1.26  | 481.0622            | 300,9989; 275,0200                        |
| Ellagic acid -hexoside                   | C <sub>20</sub> H <sub>16</sub> O <sub>13</sub> | -1 | 12.03 | 463.0519            | 300,9988; 299,9910                        |
| Pedunculagin isomer                      | C <sub>34</sub> H <sub>24</sub> O <sub>22</sub> | -1 | 1.65  | 783.0692            | 299,0193; 300,9993; 275,0191              |
| di (HHDP-galloyl-hexoside)-<br>pentoside |                                                 | -2 | 4.15  | 707.0637            | 300,9989; 275,0195; 613,0460; 783,0692    |
| Galloyl-HHDP-hexoside                    | C <sub>27</sub> H <sub>22</sub> O <sub>18</sub> | -1 | 1.97  | 633.0734            | 300,9990; 275,0197                        |
| di (HHDP-galloyl-hexoside)-<br>pentoside |                                                 | -2 | 4.51  | 707.0637            | 300,9989;<br>613,0460; 275,0195; 633,0740 |
| Galloyl-HHDP-hexoside                    | C <sub>27</sub> H <sub>22</sub> O <sub>18</sub> | -1 | 2.89  | 633.0735            | 300,9990; 275,0197                        |
| Pedunculagin isomer                      | C <sub>34</sub> H <sub>24</sub> O <sub>22</sub> | -1 | 2.52  | 783.0692            | 275,0197; 299,0206; 301,0000              |
| Digalloyl-hexoside isomer                | C <sub>20</sub> H <sub>20</sub> O <sub>14</sub> | -1 | 8.06  | 483.0780            | 169,0132; 125,0232; 331,0669; 313,0567    |
| Digalloyl-hexoside isomer                | C <sub>20</sub> H <sub>20</sub> O <sub>14</sub> | -1 | 3.73  | 483.0782            | 169,0132; 125,0232; 331,0669; 313,0567    |
| Galloyl-hexoside isomer                  | C <sub>13</sub> H <sub>16</sub> O <sub>10</sub> | -1 | 1.62  | 331.0670            | 271,0461; 169,0131; 125,0230              |
| Ellagic acid-deoxyhexoside               | C <sub>20</sub> H <sub>16</sub> O <sub>12</sub> | -1 | 15.35 | 447.0569            | 299,9910; 300,9988                        |
| Brevifolin                               | C <sub>12</sub> H <sub>8</sub> O <sub>6</sub>   | -1 | 11.45 | 247.0243            | 191,0341; 219,0301                        |
| Galloyl-hexoside isomer                  | C <sub>13</sub> H <sub>16</sub> O <sub>10</sub> | -1 | 1.92  | 331.0667            | 271,0461; 169,0131; 125,0231              |
| Galloyl-hexoside isomer                  | C <sub>13</sub> H <sub>16</sub> O <sub>10</sub> | -1 | 1.08  | 331.0670            | 169,0131; 125,0230; 271,0461; 241,0348    |
| Galloyl-hexoside isomer                  | C <sub>13</sub> H <sub>16</sub> O <sub>10</sub> | -1 | 1.42  | 331.0671            | 169,0131; 125,0230; 271,0461; 241,0349    |
| Pedunculagin isomer                      | C <sub>34</sub> H <sub>24</sub> O <sub>22</sub> | -1 | 4.77  | 783.0692            | 300,9993; 275,0196                        |
| Digalloyl-hexoside isomer                | C <sub>20</sub> H <sub>20</sub> O <sub>14</sub> | -1 | 2.00  | 483.0776            | 169,0132; 125,0232; 331,0669; 313,0567    |
| di (HHDP-galloyl-hexoside)-<br>pentoside |                                                 | -2 | 7.71  | 707.0634            | 300,9991; 275,0200; 613,0449; 783,0686    |
| Ellagic acid-pentoside                   | C <sub>19</sub> H <sub>14</sub> O <sub>12</sub> | -1 | 15.07 | 433.0408            | 300,9999; 299,9908                        |

For each compound, the chemical formula, the number of negative charges (z), the retention time (RT), the [M-H] - exp (m/z) are shown, as provided by the instrument. Also, the MS2 ions (m/z) corresponding to compound fragmentation profile used to identify the structure of the specific compound are given.

**Table S3.** Polyphenolic content in PomeGr exposed or not to *C. albicans*.

| Levels of polyphenolic compounds                           |             |                                         |                                         |            |
|------------------------------------------------------------|-------------|-----------------------------------------|-----------------------------------------|------------|
| Compounds                                                  | Peak number | PomeGr alone<br>(AUP)                   | PomeGr + <i>C. albicans</i><br>(AUP)    | % Decrease |
| Galloyl-hexoside isomer 1                                  | 1           | $7.82 \times 10^6 \pm 2.71 \times 10^5$ | $7.52 \times 10^6 \pm 4.34 \times 10^5$ | 3.8        |
| HHDP-hexoside isomer 1                                     | 2           | $3.23 \times 10^7 \pm 1.94 \times 10^6$ | $2.75 \times 10^7 \pm 3.92 \times 10^6$ | 14.9       |
| Citric acid                                                | 3           | $3.29 \times 10^9 \pm 1.50 \times 10^8$ | $3.07 \times 10^9 \pm 1.77 \times 10^8$ | 6.7        |
| HHDP-hexoside isomer 2                                     | 4           | $8.47 \times 10^7 \pm 1.98 \times 10^6$ | $6.69 \times 10^7 \pm 5.24 \times 10^6$ | 21.0       |
| Galloyl-hexoside isomer 2                                  | 5           | $1.35 \times 10^7 \pm 2.03 \times 10^6$ | $1.29 \times 10^7 \pm 5.24 \times 10^4$ | 4.4        |
| Galloyl-hexoside isomer 3                                  | 6           | $1.02 \times 10^7 \pm 3.40 \times 10^5$ | $9.57 \times 10^6 \pm 5.27 \times 10^5$ | 6.2        |
| Pedunculagin isomer 1                                      | 7           | $7.43 \times 10^6 \pm 1.61 \times 10^5$ | $462 \times 10^6 \pm 3.31 \times 10^5$  | 37.8       |
| Gallic acid                                                | 8           | $5.55 \times 10^7 \pm 2.61 \times 10^6$ | $5.21 \times 10^7 \pm 2.51 \times 10^5$ | 6.1        |
| Galloyl-hexoside isomer 4                                  | 9           | $1.29 \times 10^7 \pm 3.59 \times 10^5$ | $1.19 \times 10^7 \pm 6.12 \times 10^5$ | 7.8        |
| Galloyl-HHDP-hexoside isomer 1                             | 10          | $1.39 \times 10^7 \pm 1.68 \times 10^6$ | $1.30 \times 10^7 \pm 7.71 \times 10^5$ | 6.5        |
| Digalloyl-hexoside isomer 1                                | 11          | $1.09 \times 10^7 \pm 7.88 \times 10^5$ | $8.99 \times 10^6 \pm 6.74 \times 10^5$ | 17.5       |
| Punicalin                                                  | 12          | $6.48 \times 10^7 \pm 2.40 \times 10^6$ | $4.32 \times 10^7 \pm 2.63 \times 10^6$ | 33.3       |
| Pedunculagin isomer 2                                      | 13          | $9.07 \times 10^6 \pm 9.81 \times 10^4$ | $5.32 \times 10^6 \pm 3.00 \times 10^5$ | 41.3       |
| Galloyl-HHDP-hexoside isomer 2                             | 14          | $1.25 \times 10^7 \pm 1.42 \times 10^6$ | $1.01 \times 10^7 \pm 5.31 \times 10^5$ | 19.2       |
| Punicalagin isomer 1                                       | 15          | $3.70 \times 10^7 \pm 1.23 \times 10^6$ | $2.26 \times 10^7 \pm 1.17 \times 10^6$ | 38.9       |
| Digalloyl-hexoside isomer 2                                | 16          | $8.31 \times 10^6 \pm 8.94 \times 10^4$ | $7.25 \times 10^6 \pm 1.99 \times 10^5$ | 12.8       |
| Granatin isomer 1                                          | 17          | $2.44 \times 10^6 \pm 8.26 \times 10^4$ | $1.57 \times 10^6 \pm 6.60 \times 10^4$ | 35.7       |
| Di-[hexahydroxydiphenyl (HHDP)-galloyl-hexoside]-pentoside | 18          | $5.56 \times 10^6 \pm 2.70 \times 10^5$ | $3.56 \times 10^6 \pm 2.01 \times 10^5$ | 36.0       |
| Granatin isomer 2                                          | 19          | $1.47 \times 10^6 \pm 7.41 \times 10^4$ | $8.80 \times 10^5 \pm 1.18 \times 10^5$ | 40.1       |
| Punicalagin isomer 2                                       | 20          | $3.61 \times 10^7 \pm 1.02 \times 10^6$ | $2.04 \times 10^7 \pm 3.65 \times 10^5$ | 43.5       |
| Punicalagin isomer 3                                       | 21          | $8.04 \times 10^7 \pm 8.61 \times 10^5$ | $4.78 \times 10^7 \pm 1.51 \times 10^6$ | 40.5       |
| Brevifolin carboxylic acid                                 | 22          | $9.55 \times 10^7 \pm 2.09 \times 10^6$ | $8.69 \times 10^7 \pm 2.63 \times 10^6$ | 9.01       |
| Galloyl-HHDP-hexoside isomer 3                             | 23          | $9.39 \times 10^7 \pm 2.93 \times 10^6$ | $7.30 \times 10^7 \pm 4.98 \times 10^5$ | 22.3       |
| Ellagic acid -hexoside                                     | 24          | $1.93 \times 10^7 \pm 3.28 \times 10^5$ | n.d.                                    | 100        |
| Ellagic acid                                               | 25          | $4.08 \times 10^7 \pm 2.64 \times 10^6$ | $3.75 \times 10^7 \pm 2.46 \times 10^4$ | 8.1        |
| Ellagic acid-deoxyhexoside                                 | 26          | $5.21 \times 10^6 \pm 1.51 \times 10^5$ | $4.28 \times 10^6 \pm 2.80 \times 10^5$ | 17.9       |

Phenolic compounds were identified by HPLC-ESI-MS in PomeGr alone and after incubation with *C. albicans* (24 h). The relative amounts of each polyphenol were measured by the ion chromatogram, according to the peak area of each compound, and were expressed as AUP arbitrary units (tolerance  $\pm 5$  ppm). The % decrease was calculated comparing the AUP of treated vs untreated groups. n.d.: compound not detected
